# Supplementary material
Source: PubMed Central journal article supplement (PMC6201300)
Supplement: NIHMS986771-supplement-Supplemental_materials.pdf [file NIHMS986771-supplement-Supplemental_materials.pdf]

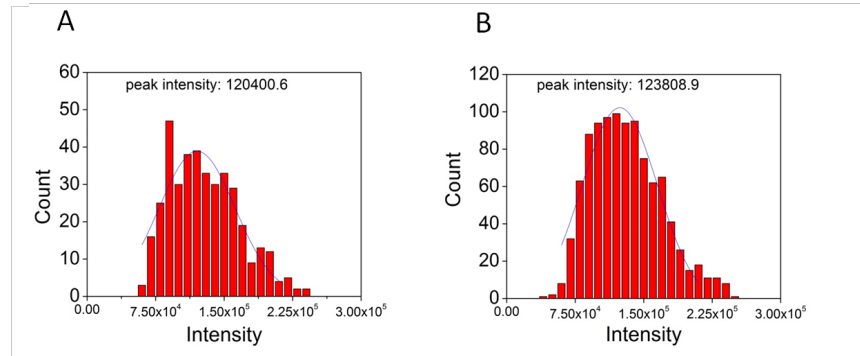

**Fig. S1.** Gaussian fitting of the intensity distribution of single RIG-I transcripts detected in (A) control cells, (B) IFN- $\beta$  treated (6 hours) cells.

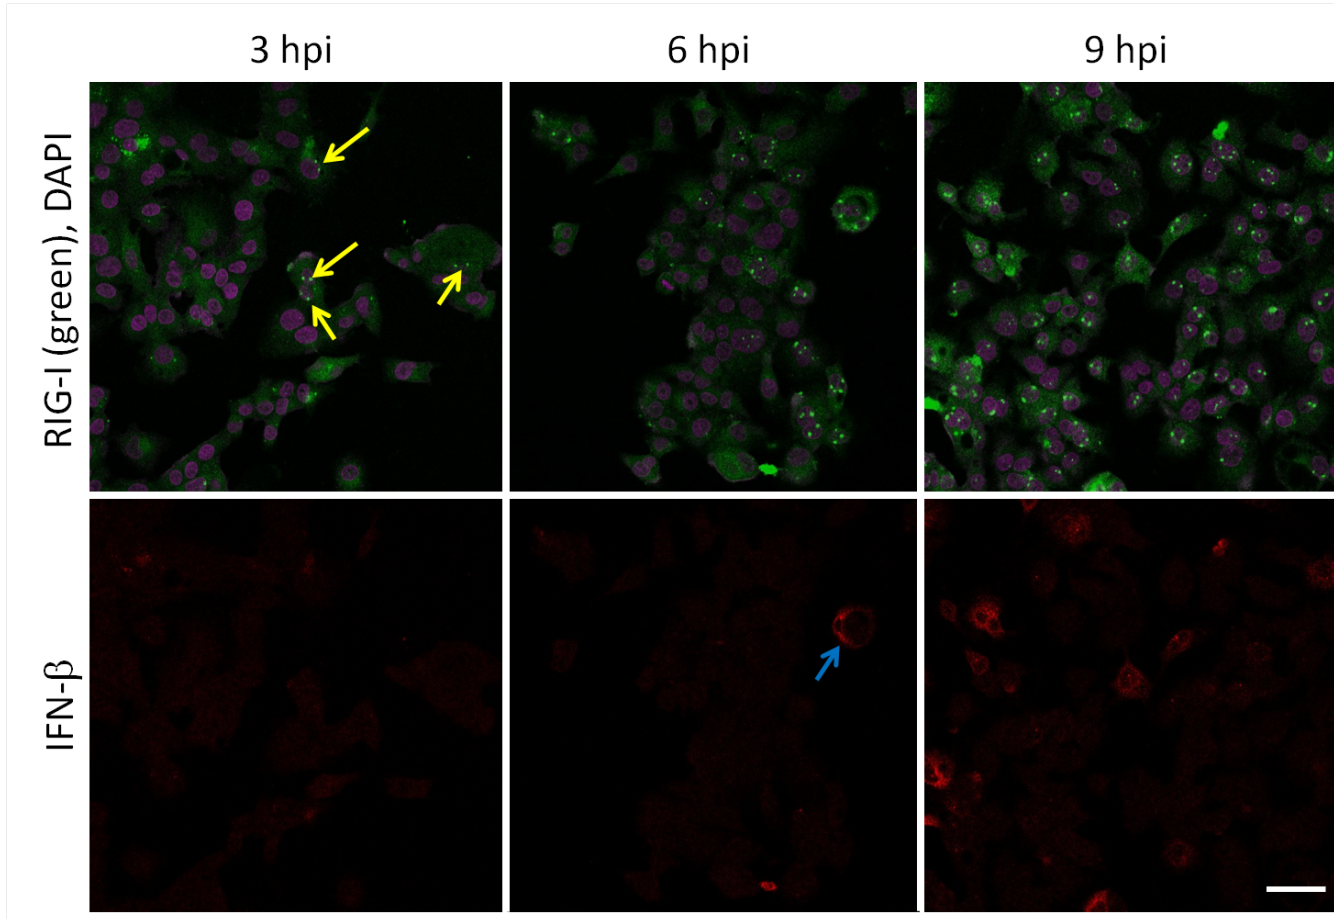

**Fig. S2.** Images of *RIG-I* and *IFNB1* mRNA in SeV infected (3, 6, and 9 hours) HepG2 cells obtained with a low magnification objective (40x). Yellow arrows show few RIG-I overexpressing cells with bright RIG-I transcription sites. Blue arrow shows an IFN-b overexpressing cell.

| Gene     | Control | IFN- $\beta$ st. | 2 hpi | 3 hpi | 6 hpi | 9 hpi  |
|----------|---------|------------------|-------|-------|-------|--------|
| N gene   | 1       | 13               | 1511  | 3179  | 13252 | 101475 |
| ADAR     | 4750    | 14675            | 4646  | 5216  | 4889  | 7644   |
| APOBEC3A | 4       | 16               | 11    | 9     | 7     | 14     |
| C6orf150 | 4       | 15               | 9     | 5     | 10    | 17     |
| DDIT4    | 677     | 904              | 960   | 773   | 699   | 1055   |
| HPSE     | 25      | 99               | 21    | 21    | 33    | 101    |
| IFNA1    | 1       | 14               | 2     | 1     | 2     | 7      |
| IFNA4    | 7       | 14               | 6     | 3     | 9     | 19     |
| IRF1     | 221     | 903              | 264   | 238   | 307   | 1256   |
| IRF2     | 897     | 1739             | 723   | 712   | 704   | 1376   |
| IRF3     | 132     | 268              | 109   | 135   | 195   | 212    |
| IRF7     | 2       | 6                | 3     | 1     | 3     | 9      |
| IRF9     | 753     | 9177             | 567   | 539   | 771   | 4195   |
| MAP3K14  | 79      | 156              | 85    | 77    | 93    | 153    |
| Mov10    | 512     | 1825             | 522   | 540   | 617   | 822    |
| NLRC5    | 58      | 555              | 42    | 66    | 40    | 70     |
| NLRX1    | 193     | 309              | 275   | 295   | 315   | 417    |
| RNAseL   | 9       | 27               | 6     | 7     | 9     | 23     |
| STAT1    | 641     | 14983            | 586   | 778   | 821   | 2317   |
| TLR3     | 17      | 469              | 9     | 11    | 18    | 41     |
| TRAIL    | 555     | 4837             | 386   | 369   | 528   | 1955   |

**Table S1.** Number of transcripts detected by Nanostring nCounter gene expression system in control, IFN- $\beta$  treated (2 hours), and SeV infected (2, 3, 6, and 9 hours) HepG2 cells. Number of transcripts is normalized to housekeeping gene GAPDH.

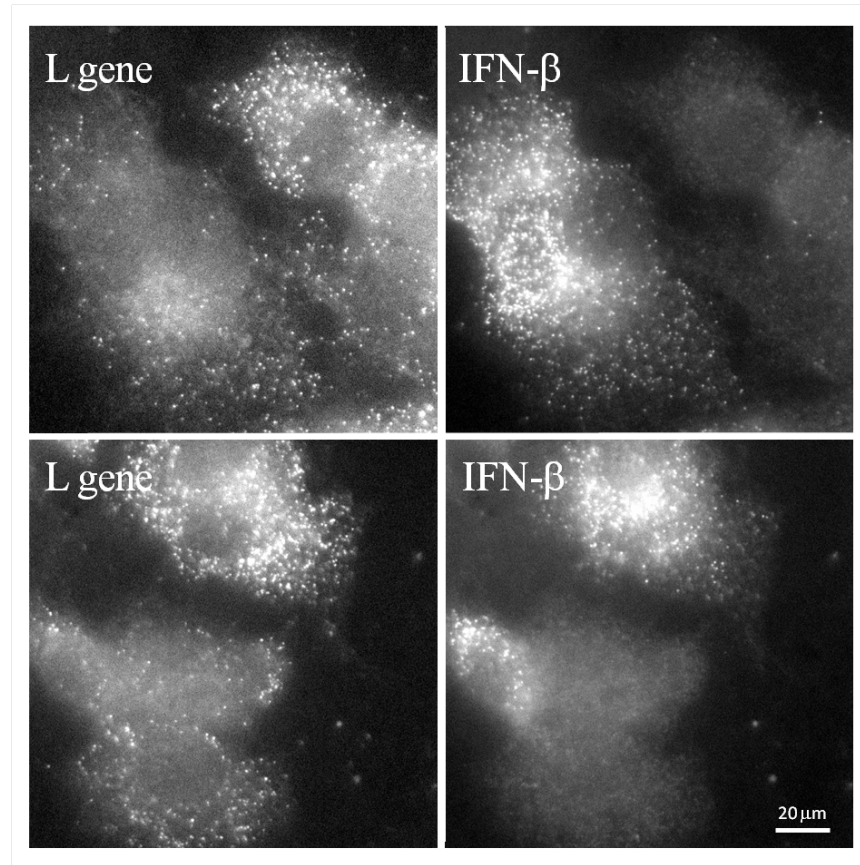

**Fig. S3.** Images of L gene and *IFNB1* mRNA in SeV infected (9 hours) HepG2 cells. Each row represents a different imaging area.

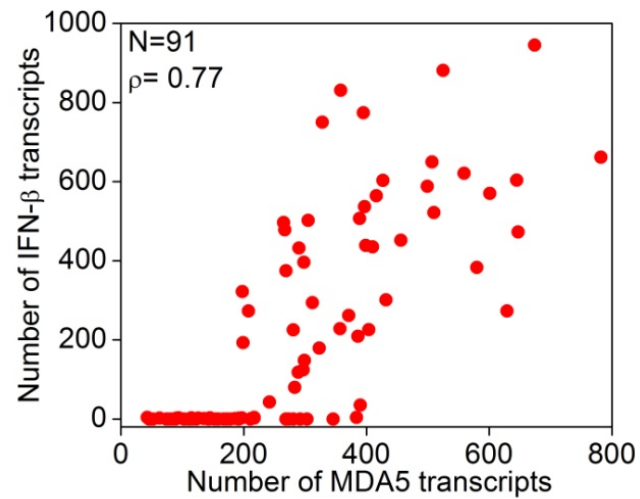

**Fig. S4** Scatter plots of number of MDA5 against *IFNB1* transcripts in single HepG2 cells at 9 hours post SeV infection. N: Number of cells analyzed, r: Pearson's correlation coefficient.
